# Supplementary material for: The Transcriptional Cofactor MCAF1/ATF7IP Is Involved in Histone Gene Expression and Cellular Senescence
Source: PubMed Central journal article supplement (PMC3728336; doi:10.1371/journal.pone.0068478), 2013-07-30

A

|    | GS DETAILS                                  | ES   | NES  | NOM p-val | FDR q-val |
|----|---------------------------------------------|------|------|-----------|-----------|
| 1  | MITOSIS                                     | 0.65 | 2.22 | 0         | 0         |
| 2  | M_PHASE_OF_MITOTIC_CELL_CYCLE               | 0.64 | 2.21 | 0         | 0         |
| 3  | REGULATION_OF_MITOSIS                       | 0.7  | 2.14 | 0         | 0         |
| 4  | SPINDLE                                     | 0.69 | 2.1  | 0         | 0         |
| 5  | CELL_DIVISION                               | 0.79 | 2.1  | 0         | 0         |
| 6  | MITOTIC_CELL_CYCLE                          | 0.55 | 2.05 | 0         | 0         |
| 7  | CYTOKINESIS                                 | 0.78 | 2.01 | 0         | 0.001     |
| 8  | CHROMOSOMEPERICENTRIC_REGION                | 0.7  | 1.99 | 0         | 0.002     |
| 9  | CYTOKINE_BIOSYNTHETIC_PROCESS               | 0.65 | 1.98 | 0         | 0.002     |
| 10 | CELL_CYCLE_PROCESS                          | 0.5  | 1.96 | 0         | 0.003     |
| 11 | CYTOKINE_METABOLIC_PROCESS                  | 0.65 | 1.96 | 0         | 0.002     |
| 12 | REGULATION_OF_CYTOKINE_BIOSYNTHETIC_PROCESS | 0.64 | 1.95 | 0         | 0.003     |
| 13 | MICROTUBULE_MOTOR_ACTIVITY                  | 0.77 | 1.92 | 0         | 0.004     |
| 14 | MICROTUBULE_CYTOSKELETON                    | 0.51 | 1.87 | 0         | 0.011     |
| 15 | CELL_CYCLE_CHECKPOINT_GO_0000075            | 0.6  | 1.87 | 0         | 0.011     |
| 16 | REPLICATION_FORK                            | 0.73 | 1.86 | 0         | 0.011     |
| 17 | M_PHASE                                     | 0.52 | 1.84 | 0         | 0.013     |
| 18 | CELL_CYCLE_PHASE                            | 0.49 | 1.83 | 0         | 0.015     |
| 19 | NEGATIVE_REGULATION_OF_TRANSLATION          | 0.71 | 1.82 | 0         | 0.017     |
| 20 | MITOTIC_CELL_CYCLE_CHECKPOINT               | 0.69 | 1.81 | 0         | 0.018     |

B

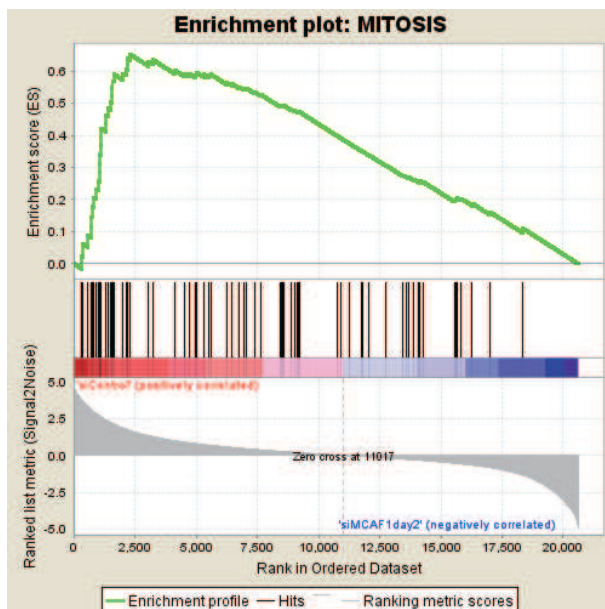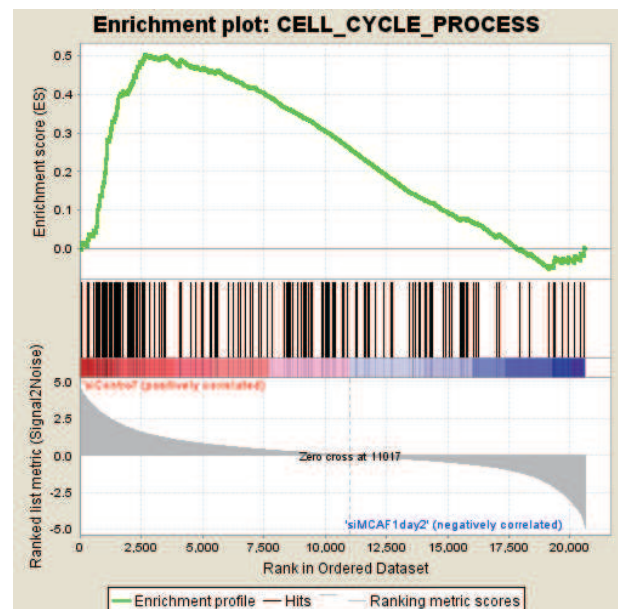

Supplement: pone.0068478.s002.pdf [file pone.0068478.s002.pdf]
