# Supplementary material for: The Transcriptional Cofactor MCAF1/ATF7IP Is Involved in Histone Gene Expression and Cellular Senescence
Source: PubMed Central journal article supplement (PMC3728336; doi:10.1371/journal.pone.0068478), 2013-07-30

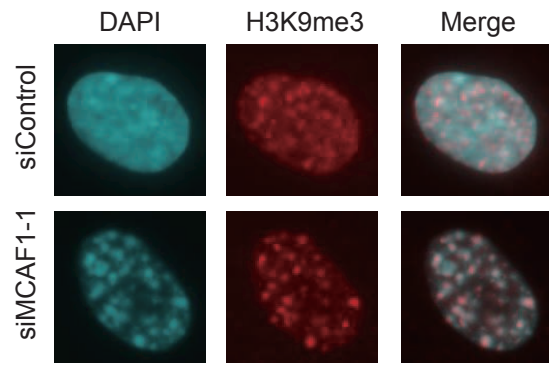

Supplement: pone.0068478.s004.pdf [file pone.0068478.s004.pdf]
