# Supplementary material for: The Transcriptional Cofactor MCAF1/ATF7IP Is Involved in Histone Gene Expression and Cellular Senescence
Source: PubMed Central journal article supplement (PMC3728336; doi:10.1371/journal.pone.0068478), 2013-07-30
Supplement: pone.0068478.s006.pdf [file pone.0068478.s006.pdf]

day 0

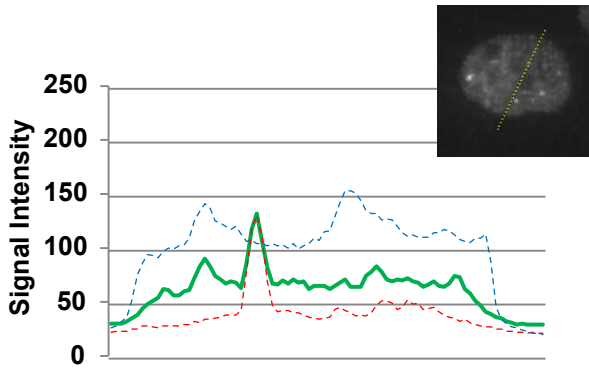

day 6

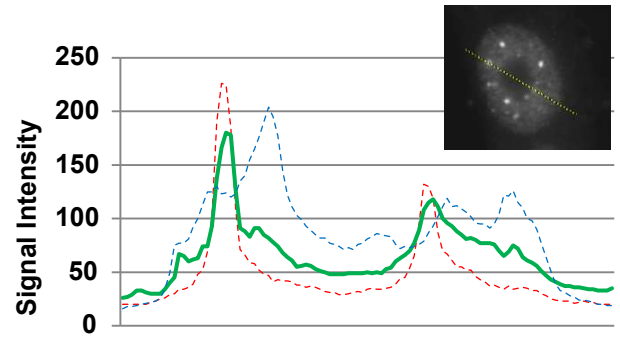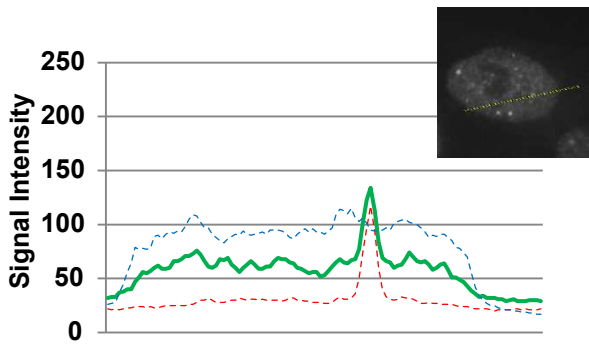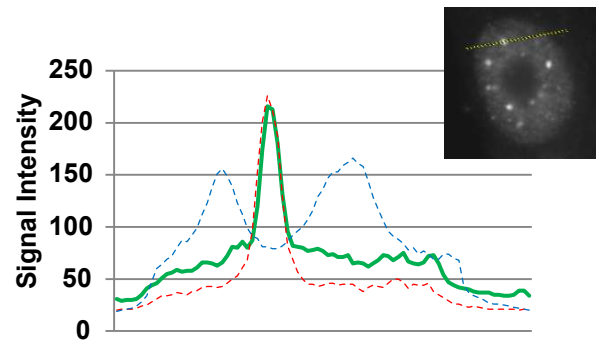

— MCAF1  
- - PML  
- - DAPI
